# Supplementary material
Source: publisher figshare collection journal article supplement (https://sage.figshare.com/ndownloader/files/18209336)

Supplementary File 1: A depiction of each outcome measure scores and direction of improvement

**Montgomery Åsberg Depression Rating Scale (MADRS)**

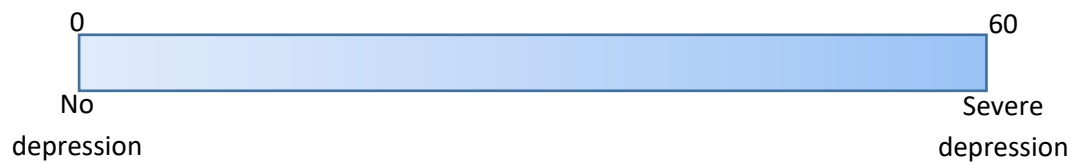

**Bipolar Depression Rating Scale (BDRS)**

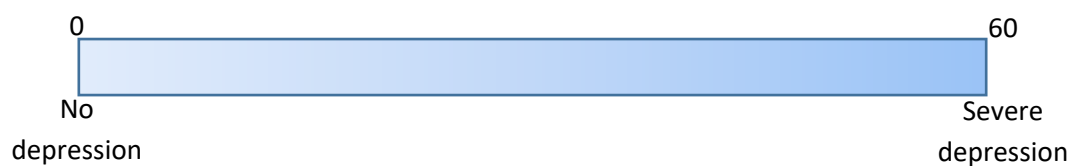

**Social and Occupational Functioning Scale (SOFAS)**

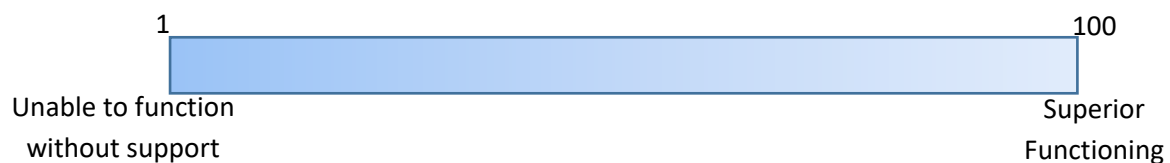

**Longitudinal Interval Follow-Up Evaluation - Range of Impaired Functioning Tool (LIFE-RIFT)**

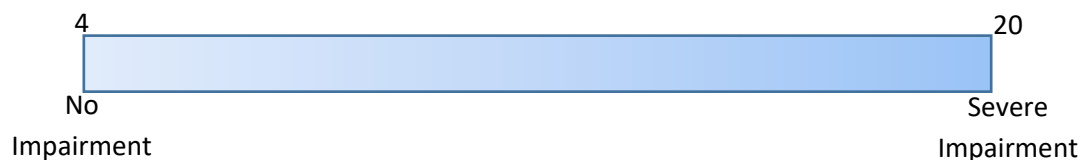

**Clinical Global Impression Improvement (CGI-I)**

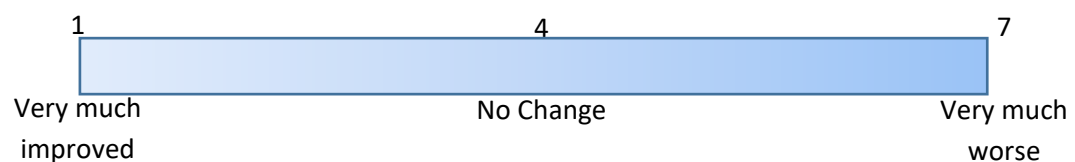

Supplement: Supplementary file 1 [file 18209336]
